# Supplementary material for: Assessment of the Impact of a Daily Rehabilitation Program on Anxiety and Depression Symptoms and the Quality of Life of People with Mental Disorders during the COVID-19 Pandemic
Source: MDPI journal article supplement (doi:10.3390/ijerph18041434), 2021-02-03
Supplement: s1 [file s1]

## PATIENT ACTIVITY CARD

Name and surname:

ID number:

Week of stay:

Dates:

| Activity                                         | Monday | Tuesday | Wednesday | Thursday | Friday |
|--------------------------------------------------|--------|---------|-----------|----------|--------|
| Psychiatric consultation                         |        |         |           |          |        |
| Psychoeducation                                  |        |         |           |          |        |
| Education of families or guardians               |        |         |           |          |        |
| Therapeutic community                            |        |         |           |          |        |
| Psychological examination                        |        |         |           |          |        |
| Individual psychological therapy                 |        |         |           |          |        |
| Group therapy with psychologist                  |        |         |           |          |        |
| Soft skills training & activization exercises    |        |         |           |          |        |
| Relaxation                                       |        |         |           |          |        |
| Individual psychotherapy                         |        |         |           |          |        |
| Morning gymnastics (group)                       |        |         |           |          |        |
| Respiratory and general fitness training (group) |        |         |           |          |        |
| Balance training (group)                         |        |         |           |          |        |
| Interval training (individual)                   |        |         |           |          |        |
| Choreo therapy                                   |        |         |           |          |        |
| Art therapy                                      |        |         |           |          |        |
| Horticulo therapy                                |        |         |           |          |        |

## PATIENT ACTIVITY CARD

Name and surname:

ID number:

|                                                 |  |  |  |  |  |
|-------------------------------------------------|--|--|--|--|--|
| Ludo therapy                                    |  |  |  |  |  |
| Music therapy                                   |  |  |  |  |  |
| Bibliotherapy                                   |  |  |  |  |  |
| Social skills training                          |  |  |  |  |  |
| Individual consultation<br>with a social worker |  |  |  |  |  |
| Computer-based<br>cognitive training            |  |  |  |  |  |
| Massage chair                                   |  |  |  |  |  |
| Culinary training                               |  |  |  |  |  |
| Others:                                         |  |  |  |  |  |
|                                                 |  |  |  |  |  |
|                                                 |  |  |  |  |  |
|                                                 |  |  |  |  |  |
|                                                 |  |  |  |  |  |

Patient's signature:
